1           Prevalence of visual impairment and its causes in adults aged 50 years and  
2                           older: Estimates from the National Eye Surveys in Malaysia

3  
4   Mohamad Aziz Salowi <sup>1,2,3¶</sup>, Nyi Nyi Naing <sup>2\*</sup>, Norasyikin Mustafa <sup>4¶</sup>, Wan Radziah Wan  
5   Nawang <sup>1¶</sup>, Siti Nurhuda Sharudin <sup>1¶</sup>, Nor Fariza Ngah <sup>5&</sup>

6  
7   <sup>1</sup> Department of Ophthalmology, Selayang Hospital, Ministry of Health, Malaysia

8   <sup>2</sup> Faculty of Medicine, Universiti Sultan Zainal Abidin, Terengganu, Malaysia

9   <sup>3</sup> Center of Clinical Research (CRC), Selayang Hospital, Ministry of Health, Malaysia

10   <sup>4</sup> Faculty of Medicine, Universiti Teknologi MARA, Selangor, Malaysia

11   <sup>5</sup> Deputy Director General Office (Research and Support), Ministry of Health, Malaysia

12  
13   \* Corresponding author

14   E-mail: [syedhatim@unisza.edu.my](mailto:syedhatim@unisza.edu.my)

15  
16   ¶These authors contributed equally to this work.

17   &These authors also contributed equally to this work

18

19

20

21

**NOTE: This preprint reports new research that has not been certified by peer review and should not be used to guide clinical practice.**

## 22 **Abstract**

## 23 **Background**

24 Population surveys are necessary to measure a community's eye care needs. We conducted  
25 simultaneous surveys in two regions in Malaysia in 2023 to estimate the prevalence of visual  
26 impairment (VI), identify its main causes, and compare the results with the survey in 2014.

27

## 28 **Methods**

29 The surveys were simultaneously done in Eastern and Sarawak administrative regions using  
30 the Rapid Assessment of Avoidable Blindness (RAAB) technique. It involved a multistage  
31 cluster sampling method, each cluster comprising 50 residents aged 50 years and older. The  
32 prevalence of VI (blindness, severeness, moderate, and early) and its primary cause were  
33 determined through a visual acuity check and eye examination with a hand-held  
34 ophthalmoscope. Results were compared with the previous survey in 2014.

35

## 36 **Results**

37 A total of 10,184 subjects were enumerated, and 9,709 were examined (94.5% and 96.2%  
38 responses for Eastern and Sarawak, respectively). The prevalence of blindness and severe VI  
39 appeared to decrease. For blindness: Eastern 1.4%, 95%CI (0.9, 1.9) to 0.8%, 95%CI (0.5,  
40 1.1) and Sarawak: 1.6% 95%CI (1.0, 2.1) to 0.6%, 95%CI (0.3, 0.9). For severe VI: Eastern  
41 1.2%, 95%CI (0.8, 1.7) to 0.9%, 95%CI (0.6, 1.1) and Sarawak 1.1% 95%CI (0.6, 1.6) to  
42 0.9%, 95% CI(0.6, 1.2). The main cause of blindness was untreated cataracts: 77.3%  
43 (Eastern) and 75.0% (Sarawak). Diabetic retinopathy was the 2<sup>nd</sup> main cause of blindness for  
44 Eastern at 9.1%, but it only caused early to severe VI in Sarawak.

## 45 **Conclusion**

46 The prevalence of blindness and severe VI were reduced. The reduction could have been  
47 attributed to a community cataract program implemented soon after the survey in 2014.  
48 However, more efforts are needed to address the high percentage of avoidable blindness  
49 within both regions.

50

51

## 52 **Introduction**

53 Malaysia is one of the 37 member states of the World Health Organisation (WHO) Western  
54 Pacific Region [1]. As part of the global and regional eye health agendas, Malaysia has been  
55 actively engaged with other countries within the Western Pacific Region in planning,  
56 implementing, and monitoring community programs related to the Prevention of Blindness  
57 and Low Vision (PBL) initiatives. The activities' coverage expanded and strengthened after  
58 the country endorsed and signed the World Health Assembly (WHA) 66.4 resolution in May  
59 2013 [2,3]. By signing the resolution, Malaysia is committed to being part of the Global  
60 Action Plan, the core activity and aim of which is providing Universal Health Care (UHC) to  
61 the population [3].

62 Malaysia is divided into six regions for the PBL administrative purposes: Northern, Eastern,  
63 Central, Southern, Sabah and Sarawak (Fig 1). Simultaneous surveys were done in 2014 for  
64 each region as a baseline, and the results were published. The main finding of the surveys  
65 was a higher prevalence of blindness in the peripheral regions, namely Sabah, Sarawak,  
66 Northern, and Eastern regions, and a discrepancy between all regions [4]. One of the national  
67 action plans planned and implemented was to introduce a community interventional eye care  
68 program, which could potentially reach the underserved population especially in remote

69 areas. Guided by the pre-existing basic community program and the availability of eye-  
70 trained human resources, the Eastern Region and Sarawak were selected as the regions where  
71 this program would be piloted.

72

73 **Fig 1. Survey administrative regions, total population, and percentage of individuals 50**  
74 **years and older in Malaysia.** (This study surveyed Eastern and Sarawak only).

75

76 This study aims to determine the difference or improvement in the prevalence of visual  
77 impairment (VI) between the two administrative regions from the previous survey.

## 78 **Material and Methods**

79 A follow-up survey was required to compare the prevalence of VI before and after the  
80 community eye care program's implementation. These cross-sectional, population-based  
81 surveys, which followed the World Health Organization (WHO) RAAB protocol, were  
82 conducted simultaneously from 27 July 2023 to 7 October 2023. The surveys also collected  
83 data on cataract surgical coverage (CSC) and cataract surgical outcomes, the results of which  
84 will be discussed in another manuscript.

85 Each region had six (6) data collector teams comprising three persons: two doctors and one  
86 allied health staff member trained in ophthalmology. Each team was responsible for  
87 surveying 16-17 randomly selected clusters, examining 50 residents aged 50 years and older.  
88 Population sampling was per RAAB methodology, a widely used, WHO-recommended  
89 method for population-based surveys of the prevalence of VI and its causes. The RAAB  
90 survey protocol and methodology have been described elsewhere [5].

91

92

## 93 **Sampling frame**

94 Department of Statistics, Malaysia (DOSM) conducts nationwide data collection for the  
95 National Population and Housing Census once every ten years. An Enumeration Block (EB),  
96 the smallest population unit, with 80-120 living quarters each, is demarcated based on the  
97 latest findings and the population distribution, followed by the development of a  
98 corresponding geographical map, indicating the exact location and boundaries of each EB.  
99 The EBs are gazetted for field work operations, for example, Morbidity, Nutrition, Household  
100 Expenditure, and Labor Force Survey [6]. The complete list of all EBs from the 2020  
101 national census was used to select clusters for the RAAB. A total of 105 EBs were randomly  
102 chosen for Eastern and 98 EBs for Sarawak regardless of strata, using the Probability  
103 Proportionate to Size (PPS) technique. Individual EB codes and the corresponding maps were  
104 then used to identify the location of the EBs during fieldwork data collection.

## 105 **Training**

106 Training for survey teams was conducted separately in each region before the fieldwork by a  
107 certified Western Pacific RAAB trainer to ensure data quality and strict adherence to study  
108 protocol. Survey team members were required to attend four training days, including RAAB  
109 lectures, inter-observer variation assessment and an actual survey in one of the nearby EBs  
110 during fieldwork. Each region had one coordinator responsible for the smooth  
111 implementation and progress of the survey.

## 112 **Survey Methods**

113 Each team was assigned to survey 16-17 EBs. Subjects were selected from each block using  
114 the Compact Segment Sampling method. The population area was divided into segments of  
115 equal population size, enough to provide the required number of eligible people aged 50  
116 years and older. The survey started in a randomly selected segment until 50 eligible people

117 had been examined. If all houses in the segment had been visited and the number of subjects  
118 was insufficient, then a second random segment was picked for the survey team to continue  
119 until they recruited 50 subjects.

120 If the subject was unavailable at home, the contact number would be taken from the  
121 neighbours, and a revisit would be done before the team left the survey area. If the subject  
122 could not be examined after three revisits, this person would be recorded as 'Not Available',  
123 and the vision status reported by relatives or neighbours would be taken. Door-to-door  
124 interviews were conducted in each randomly selected EB. Subjects were recruited if they  
125 were 50 years and older, a Malaysian resident of at least six months, and gave informed  
126 consent. Written consent from all participants was obtained, as stated in the ethics statement.  
127 Participants were provided with a consent form that clearly explained the study's purpose,  
128 procedures, potential risks, and their rights as participants. The consent form was written in a  
129 language that participants understood and they were given sufficient time to review and ask  
130 any questions before providing their written consent. In cases where verbal consent was  
131 obtained from illiterate respondents, we have documented and witnessed it according to the  
132 established protocol.

133 A total of 50 subjects were recruited in each EB. All recruited subjects had a brief interview,  
134 where demographic, medical and ocular history data were taken. It was followed by visual  
135 acuity assessment at a distance of three meters using tablets installed with the RAAB7  
136 application with built-in quality control measures [7,8]. An eye examination was performed  
137 by the doctors in the survey team using a hand-held ophthalmoscope. Should subjects have a  
138 visual impairment, the primary cause was identified, and the subjects were referred to the  
139 nearest ophthalmic care facility for further management.

140 Inter-observer variation was conducted separately in each region before the survey. During  
141 the inter-observer variation assessment, six survey teams were assessed in their agreements,

142 asking 15 questions to subjects comprising patients and staff from the Ophthalmology  
143 Outpatient Department. There were 20 subjects with mixed normal and impaired vision,  
144 including cataracts, (pseudo)aphakia or posterior segment diseases. The six survey teams  
145 examined the same 20 individuals during the assessment. The other teams' findings were  
146 compared to those of the most senior or experienced team (as the gold standard).

## 147 **Definition**

148 National Eye Survey, NES II, was conducted in 2014, and the survey under discussion, NES  
149 III, was conducted in 2023. Although the later survey only involved two out of six regions,  
150 the national PBL committee agreed to maintain the "National/NES" label for branding and  
151 advocacy purposes.

152 The Kappa coefficient values were classified as poor ( $<0.20$ ), fair (0.21-0.40), moderate  
153 (0.41-0.60), good (0.61-0.80), and very good (0.81-1.00).

154 The prevalence of distance VI was reported using Presenting Visual Acuity (PVA) in the  
155 better eye, measured with correction, if available. VI categories were defined according to the  
156 Visual Acuity (VA) thresholds used in the WHO's International Classification of Diseases  
157 (ICD-11) [9]:

- 158 • Blindness: PVA less than 3/60 in the better eye
- 159 • Severe VI: PVA less than 6/60 to 3/60 in the better eye
- 160 • Moderate VI: PVA less than 6/18 to 6/60 in the better eye
- 161 • Mild VI: PVA less than 6/12 to 6/18 in the better eye

162 Once identified after eye examination, the primary cause of VI was categorized into treatable,  
163 preventable, avoidable, and posterior segment disease. Treatable VI were conditions that can  
164 be treated (for example, Refractive Error, Aphakia, and Cataract). Preventable VI were  
165 conditions that could be prevented by Primary Health Care (PHC), Primary Eye Care (PEC),  
166 or specialized ophthalmic services. Treatable and Preventable constituted Avoidable.

## 167 **Sample size calculation**

168 The latest population data was obtained from the Malaysian National Census 2020 [10, 11].  
169 A prevalence of blindness of 1.5 % in Eastern and 1.6% in Sarawak among subjects aged 50  
170 and older from NES II (2014) was used in the calculation using a 95% confidence interval,  
171 precision of 30% and estimated design effect (DEFF) of 1.5. It took into consideration the  
172 possibility of 20% non-response [4,5]. The calculation resulted in a sample size of 105  
173 clusters (5239 subjects aged 50 years and older) and 98 clusters (4900 subjects aged 50 years  
174 and older) for Eastern and Sarawak, respectively.

## 175 **Statistical Analysis**

176 Data were entered into the cloud-based RAAB7 software using tablets. The software had an  
177 in-built inconsistency check and validation for double data entry. It reported the prevalence of  
178 VI in percentages and 95% Confidence Interval values by adjusting for age and sex. Other  
179 categorical data were reported in frequency and percentage. Raw data and digital reports were  
180 generated automatically in real-time and accessible to the authorized investigators through  
181 the web-based portal.

182

## 183 **Results**

184 The Kappa results for the Eastern survey team were 24.0% moderate, 50.7% good and 25.3%  
185 very good agreement with the "gold standard" survey team. The Sarawak survey team were  
186 1.3% fair, 34.7% moderate, 40.0% good and 24.0% very good agreement with the "gold  
187 standard" survey team.

188 A total of 10,184 subjects 50 years old and older were enumerated: Eastern, n= 5,250,  
189 Sarawak, n= 4,934). A total of 9,709 were examined: Eastern, n= 4,961 (94.5% response),  
190 Sarawak, n= 4,748 (96.2% response). These subjects represented 0.5% of all people aged 50



191 and older in both regions. Of the 475 non-respondents, 73 (0.7%) refused to participate, 329  
 192 (3.3%) were incapable of being examined due to communication problems such as deafness  
 193 or dementia, and 73 (0.8)% were not available. More female subjects were examined, n=  
 194 5,520 (56.8%) (Table 1).

195

196 **Table 1. Examination Status, NES III (2023).**

| <b>EASTERN</b>             | Female |      | Male |     | Total |      |
|----------------------------|--------|------|------|-----|-------|------|
| <b>Examination Status:</b> | n      | %    | n    | %   | n     | %    |
| Examined*                  | 2829   | 95.6 | 2132 | 93  | 4961  | 94.5 |
| Refused                    | 20     | 0.7  | 17   | 0.7 | 37    | 0.7  |
| Incapable                  | 83     | 2.8  | 105  | 4.6 | 188   | 3.6  |
| Unavailable                | 26     | 0.9  | 38   | 1.7 | 64    | 1.2  |
| Total**                    | 2958   | 100  | 2292 | 100 | 5250  | 100  |
| <b>SARAWAK</b>             | Female |      | Male |     | Total |      |
| <b>Examination Status:</b> | n      | %    | n    | %   | n     | %    |
| Examined*                  | 2691   | 96.4 | 2057 | 96  | 4748  | 96.2 |
| Refused                    | 28     | 1    | 8    | 0.4 | 36    | 0.7  |
| Incapable                  | 67     | 2.4  | 74   | 3.5 | 141   | 2.9  |
| Unavailable                | 6      | 0.2  | 3    | 0.1 | 9     | 0.2  |
| Total**                    | 2792   | 100  | 2142 | 100 | 4934  | 100  |

\* Total examined (Percentage is the response rate)

\*\* Total enumerated

197

198 The sample had less younger subjects in both genders (50-59 years old) than the survey area,  
 199 but had more subjects in the older age group (except in the age group 80+ in Sarawak) (Fig  
 200 2). All the results, therefore, were analyzed using age-sex-adjusted estimates due to the  
 201 difference.

202

203 **Fig 2. Population in Sample vs Survey Areas, NES III (2023).**

204

205 There was a higher prevalence of blindness in the Eastern Region than Sarawak: 0.8%,  
 206 95%CI (0.5, 1.1) vs 0.6%, 95%CI (0.3,0.9). However, the prevalence of blindness and  
 207 prevalence of severe VI appeared to decrease, comparing the results to NES II (2014):

208 Blindness Eastern from 1.4%, 95%CI (0.9, 1.9) to 0.8%, 95%CI (0.5, 1.1) and Blindness  
209 Sarawak from 1.6% 95%CI (1.0, 2.1) to 0.6%, 95%CI (0.3, 0.9). Severe VI Eastern from  
210 1.2%, 95%CI (0.8, 1.7) to 0.9%, 95%CI (0.6, 1.1) and Severe VI Sarawak from 1.1% 95%CI  
211 (0.6, 1.6) to 0.9%, 95%CI (0.6, 1.2) (Table 2). There was no significant difference between  
212 males and females in any category of Visual Impairment during both surveys (Table 2).

213 **Table 2. Adjusted prevalence and magnitude of Blindness, severe, moderate, and mild vision impairment- Comparing NES II (2014) and**  
 214 **NES III (2023).**

| <b>EASTERN</b>   | NES II (2014) |           |      |           |       |           | NES III (2023) |           |      |           |       |           |
|------------------|---------------|-----------|------|-----------|-------|-----------|----------------|-----------|------|-----------|-------|-----------|
|                  | Female        |           | Male |           | Total |           | Female         |           | Male |           | Total |           |
| <b>VI level:</b> | %             | 95% CI    | %    | 95% CI    | %     | 95% CI    | %              | 95% CI    | %    | 95% CI    | %     | 95% CI    |
| Blind            | 1.6           | 1.0, 2.3  | 1.2  | 0.5, 1.9  | 1.4   | 0.9, 1.9  | 0.9            | 0.5, 1.2  | 0.7  | 0.3, 1.1  | 0.8   | 0.5, 1.1  |
| Severe           | 1.4           | 0.7, 2.0  | 1.1  | 0.4, 1.8  | 1.2   | 0.8, 1.7  | 0.7            | 0.4, 1.1  | 0.9  | 0.5, 1.4  | 0.9   | 0.6, 1.1  |
| Moderate         | 5.7           | 4.2, 7.2  | 4.7  | 3.2, 6.2  | 5.2   | 4.2, 6.3  | 7.2            | 6.0, 8.3  | 6.5  | 5.3, 7.6  | 6.7   | 5.8, 7.6  |
| Mild             | 11.3          | 9.2, 13.5 | 8.2  | 6.2, 10.2 | 9.8   | 8.1, 11.6 | 7.1            | 6.1, 8.2  | 6    | 4.8, 7.3  | 6.4   | 5.5, 7.3  |
| <b>SARAWAK</b>   |               |           |      |           |       |           |                |           |      |           |       |           |
| <b>VI level:</b> | %             | 95% CI    | %    | 95% CI    | %     | 95% CI    | %              | 95% CI    | %    | 95% CI    | %     | 95% CI    |
| Blind            | 2.1           | 1.3, 3.0  | 1    | 0.4, 1.7  | 1.6   | 1.0, 2.1  | 0.8            | 0.4, 1.2  | 0.4  | 0.1, 0.8  | 0.6   | 0.3, 0.9  |
| Severe           | 1.3           | 0.6, 2.0  | 0.9  | 0.3, 1.5  | 1.1   | 0.6, 1.6  | 0.9            | 0.5, 1.3  | 1    | 0.5, 1.4  | 0.9   | 0.6, 1.2  |
| Moderate         | 7.8           | 5.8, 9.9  | 7.4  | 5.4, 9.4  | 7.6   | 5.8, 9.4  | 8.8            | 7.5, 10.1 | 6.8  | 5.3, 8.3  | 7.8   | 6.6, 9.0  |
| Mild             | 11.5          | 8.9, 14.1 | 10   | 8.0, 11.9 | 10.7  | 8.8, 12.6 | 10.1           | 8.7, 11.5 | 8.8  | 7.3, 10.2 | 9.4   | 8.3, 10.6 |

215 CI = Confidence Interval; NES = National Eye Survey; VI = Visual Impairment

216

217

218

219

220

221

222

223

224



226 The main cause of blindness was untreated cataracts: 77.3% (Eastern) and 75.0% (Sarawak).  
227 Although diabetic retinopathy was the 2<sup>nd</sup> leading cause of blindness in Eastern (9.1%) and  
228 severe VI (6.2%), it was not the cause of blindness but the 4<sup>th</sup> leading cause of severe VI in  
229 Sarawak (2.1%) (Table 3). As high as 95.5% of the primary causes of blindness in Eastern  
230 and 90.6% in Sarawak were avoidable (Table 4).

231 **Table 3. Principal cause of blindness, severe, moderate, and mild vision impairment, NES III (2023).**

| No | Principal.Cause                  | EASTERN |      |        |      |          |      |       |      | SARAWAK |      |        |      |          |      |       |      |
|----|----------------------------------|---------|------|--------|------|----------|------|-------|------|---------|------|--------|------|----------|------|-------|------|
|    |                                  | Blind   |      | Severe |      | Moderate |      | Early |      | Blind   |      | Severe |      | Moderate |      | Early |      |
|    |                                  | n       | %    | n      | %    | n        | %    | n     | %    | n       | %    | n      | %    | n        | %    | n     | %    |
| 1  | Refractive error                 | 0       | 0    | 2      | 4.2  | 182      | 46.4 | 287   | 79.3 | 0       | 0    | 2      | 4.3  | 148      | 35.7 | 307   | 64   |
| 2  | Aphakia                          | 0       | 0    | 0      | 0    | 0        | 0    | 0     | 0    | 0       | 0    | 0      | 0    | 0        | 0    | 0     | 0    |
| 3  | Cataract                         | 34      | 77.3 | 39     | 81.2 | 179      | 45.7 | 63    | 17.4 | 24      | 75.0 | 38     | 80.9 | 246      | 59.3 | 143   | 29.8 |
| 4  | Cataract surgical complications  | 0       | 0    | 0      | 0    | 4        | 1    | 0     | 0    | 0       | 0    | 1      | 2.1  | 2        | 0.5  | 3     | 0.6  |
| 5  | Trachomatous corneal opacity     | 0       | 0    | 0      | 0    | 0        | 0    | 0     | 0    | 0       | 0    | 0      | 0    | 0        | 0    | 0     | 0    |
| 6  | Other corneal opacity            | 0       | 0    | 1      | 2.1  | 1        | 0.3  | 0     | 0    | 1       | 3.1  | 0      | 0    | 0        | 0    | 0     | 0    |
| 7  | Pterygium                        | 1       | 2.3  | 0      | 0    | 5        | 1.3  | 3     | 0.8  | 1       | 3.1  | 2      | 4.3  | 8        | 1.9  | 10    | 2.1  |
| 8  | Phthisis                         | 1       | 2.3  | 0      | 0    | 0        | 0    | 0     | 0    | 2       | 6.2  | 0      | 0    | 0        | 0    | 0     | 0    |
| 9  | Onchocerciasis                   | 0       | 0    | 0      | 0    | 0        | 0    | 0     | 0    | 0       | 0    | 0      | 0    | 0        | 0    | 0     | 0    |
| 10 | Glaucoma                         | 2       | 4.5  | 1      | 2.1  | 7        | 1.8  | 0     | 0    | 1       | 3.1  | 2      | 4.3  | 1        | 0.2  | 3     | 0.6  |
| 11 | Diabetic Retinopathy             | 4       | 9.1  | 3      | 6.2  | 8        | 2    | 6     | 1.7  | 0       | 0    | 1      | 2.1  | 7        | 1.7  | 10    | 2.1  |
| 12 | Age-related macular degeneration | 0       | 0    | 0      | 0    | 3        | 0.8  | 1     | 0.3  | 0       | 0    | 0      | 0    | 1        | 0.2  | 0     | 0    |
| 13 | Other posterior segment disease  | 2       | 4.5  | 2      | 4.2  | 3        | 0.8  | 2     | 0.6  | 3       | 9.4  | 1      | 2.1  | 2        | 0.5  | 3     | 0.6  |
| 14 | Myopic degeneration              | 0       | 0    | 0      | 0    | 0        | 0    | 0     | 0    | 0       | 0    | 0      | 0    | 0        | 0    | 0     | 0    |
| 15 | Other globe or CNS abnormalities | 0       | 0    | 0      | 0    | 0        | 0    | 0     | 0    | 0       | 0    | 0      | 0    | 0        | 0    | 1     | 0.2  |
|    | Total                            | 44      | 100  | 48     | 100  | 392      | 100  | 362   | 100  | 32      | 100  | 47     | 100  | 415      | 100  | 480   | 100  |

232 CNS = Central Nervous System

233

234

235

236

237 **Table 4. Principal cause of Blindness (PVA <3/60), by gender and intervention category, NES III (2023).**

| <b>EASTERN</b> |                                                   | Male |      | Female |      | Total |      |
|----------------|---------------------------------------------------|------|------|--------|------|-------|------|
| Group          | Intervention Category (refer Table 3 for numbers) | n    | %    | n      | %    | n     | %    |
| A              | Treatable (1, 2, 3)                               | 22   | 81.5 | 12     | 70.6 | 34    | 77.3 |
| B              | Preventable (PHC/PEC services) (5, 6, 7, 8, 9)    | 1    | 3.7  | 1      | 5.9  | 2     | 4.5  |
| C              | Preventable (Ophthalmic services) (4, 10, 11)     | 3    | 11.1 | 3      | 17.6 | 6     | 13.6 |
| D              | Avoidable (A + B + C)                             | 26   | 96.3 | 16     | 94.1 | 42    | 95.5 |
| E              | Posterior segment disease (9, 10, 11, 12, 13, 14) | 4    | 14.8 | 4      | 23.5 | 8     | 18.2 |
| <b>SARAWAK</b> |                                                   | n    | %    | n      | %    | n     | %    |
| Group          | Intervention Category (refer Table 3 for numbers) | n    | %    | n      | %    | n     | %    |
| A              | Treatable (1, 2, 3)                               | 17   | 77.3 | 7      | 70.0 | 24    | 75.0 |
| B              | Preventable (PHC/PEC services) (5, 6, 7, 8, 9)    | 3    | 13.6 | 1      | 10.0 | 4     | 12.5 |
| C              | Preventable (Ophthalmic services) (4, 10, 11)     | 1    | 4.5  | 0      | 0    | 1     | 3.1  |
| D              | Avoidable (A + B + C)                             | 21   | 95.5 | 8      | 80.0 | 29    | 90.6 |
| E              | Posterior segment disease (9, 10, 11, 12, 13, 14) | 2    | 9.1  | 2      | 20.0 | 4     | 12.5 |

238 PVA = Presenting Visual Acuity; PHC = Primary Health Care; PEC = Primary Eye Care

239

240

241

242

243

244

## 245 **Discussion**

246 The availability of RAAB7 software facilitated data entry and cleaning during NES III. The  
247 web platform with live survey data visibility enabled real-time monitoring for quality  
248 assurance throughout the survey. The trainer and investigators could identify and respond to  
249 any issues and questions from the data collectors on the ground in real time. Compared to  
250 NES II (2014), digitalization of data entry, cleaning, analysis and delivery of reports during  
251 NES III (2023) assured data quality. It saved time and, therefore, costs needed to support the  
252 survey teams on the ground as the duration of data collection was shortened.

253 Females formed 56.4% out of the 10,184 subjects enumerated. This population gender ratio  
254 was not consistent with the national census [10,11]. The sample also had less younger  
255 subjects in both genders (50-59 years old) than the survey area, but had more subjects in the  
256 older age group (except in the age group 80+ in Sarawak). It could be explained by the  
257 possibility that females in both regions tend to stay at home, not working, resulting in them  
258 having a higher chance of being enumerated. The younger age group (50-59 years old) in  
259 both genders could also likely be away at work when the survey teams visited due to work or  
260 social commitments. This pattern is consistent and can be seen in other surveys [12-16].

261 The prevalence of blindness during the six simultaneous RAAB (NES II 2014) in Malaysia  
262 ranged from 0.5-1.9% (with a calculated weightage of 1.2%) [4]. The prevalence was reduced  
263 to 0.8% and 0.6% for two regions (Eastern and Sarawak, respectively) during NES III in  
264 2023. In general, the prevalence of VI during NES II and III were lower compared to other  
265 countries in the South East Asia Region [17-19]. It is essential to acknowledge the country's  
266 position regarding the prevalence compared to neighbouring countries, but achieving a  
267 reduction following an intervention is more important or meaningful.

268 The prevalence of diabetic retinopathy resulting in visual impairment in Eastern was higher  
269 than in Sarawak. This is consistent with the findings of a higher prevalence of diabetes



270    mellitus in Eastern than Sarawak [20]. We acknowledge that more work needs to be done at  
271    the Ministerial level with the Non-Communicable Disease division to strategically  
272    collaborate to curtail the increasing number of people with diabetes mellitus and prevent  
273    diabetic retinopathy through more active nationwide screening initiatives.  
274    One of the national initiatives which can potentially be strengthened for diabetic retinopathy  
275    screening is the *Klinik Katarak-Kementerian Kesihatan Malaysia* (Cataract Clinic Ministry of  
276    Health Malaysia, *KK-KKM*), an outreach arm of the ministry to reach the population (Fig 3).  
277    It was launched in 2014 in Sarawak and the Eastern Region of Malaysia as part of the  
278    country's progress commitments with the World Health Assembly (WHA) 66.4 resolution. It  
279    was also implemented as part of the national action plan following the findings of the NES II  
280    (2014). The modified buses transport surgical and medical equipment along the selected  
281    service routes according to the location of Provincial Hospitals, which are used as the  
282    primary service sites. Once arrived at the site, the equipment is offloaded and used in the  
283    clinic (for screening) or operating room for (cataract surgery).

284

285    **Fig 3. The Mobile Unit on a boat en route to Kapit, a remote district in Sarawak.**

286

287    The service concept is based on operating near patients' homes. Unlike other cataract mobile  
288    units in other countries, surgery is not done on the bus [21-23]. Instead, all activities optimize  
289    the provincial hospitals' existing facilities that otherwise have low usage due to low  
290    population density. The KK-KKM project in both regions is focused on scheduled trips for  
291    screening, surgery and revisiting after one month to assess visual outcomes. The timetable is  
292    distributed to all the provincial hospitals at the beginning of the calendar year. The fixed  
293    schedule allows people in remote areas to plan their finances and trips to come forward and  
294    seek eye treatment.

295 Although branded as a cataract surgical program, the screening platform and community  
296 engagement activities within the program encourage eye care advocacy within the  
297 community. KK-KKM allows screening of any individuals with any eye problems. They will  
298 be treated or referred to the nearest hospitals accordingly. It features a collaboration of  
299 multiple stakeholders and eye care providers from the community, Non-Governmental  
300 Bodies (NGOs), local Councils, Community Nurses, Primary Eye Care Doctors, Optometrists  
301 and Ophthalmologists. Data from cataract surgeries performed at the KK-KKM locations are  
302 also monitored centrally for the centre and individual surgeons's performance monitoring [24-  
303 31].

304 The concept of "Bringing High Impact Quality Eye Care Closer to Home", community  
305 engagement/advocacy and performance monitoring in outreach cataract surgery could have  
306 explained the reduction in the prevalence of blindness within both regions after nine years of  
307 service. The objective, concept and work process were endorsed by WHO when it was  
308 selected as a Case Study for the Western Pacific WHO Innovation Challenge in 2021/2022  
309 [32].

310

## 311 **Conclusion**

312 The prevalence of blindness and severe VI were reduced. The reduction could have been  
313 attributed to the KK-KKM, an outreach project operational at the community level. However,  
314 more efforts are needed to address the high percentage of avoidable blindness within both  
315 regions.

316

317

318

## 319 **Acknowledgments**

320 The authors would like to thank the Director General of the Ministry of Health Malaysia for  
321 his permission to publish this article. The authors would also like to acknowledge the  
322 contribution of data entry by the data collectors during both NES II and III.

323

## 324 **References**

325 1. World Health Organization. WHO/IAPB Meeting on Cataract Surgery Outcomes  
326 Monitoring Systems, Kuala Lumpur, Malaysia, 19–20 September 2018: meeting report.  
327 URL:<https://pesquisa.bvsalud.org/portal/resource/pt/who-325946>.

328 2. World Health Organization. Sixty-sixth World Health Assembly: Resolutions and  
329 Decisions Annexes 2013.

330 3. World Health Organization. Universal eye health: a global action plan 2014-2019.  
331 URL:[https://www.who.int/publications/i/item/universal-eye-health-a-global](https://www.who.int/publications/i/item/universal-eye-health-a-global-action-plan-2014-2019) action  
332 plan-2014-2019.

333 4. Chew FLM, Salowi MA, Mustari Z, Husni MA, Hussein E, Adnan TH, et al. Estimates  
334 of Visual Impairment and its Causes from the National Eye Survey in Malaysia  
335 (NESII). *PLoS One*. 2018;13(6):e0198799. DOI: 10.1371/journal.pone.0198799  
336 PMID: 29944677

337 5. Kuper H, Polack S, Limburg H. Rapid Assessment of Avoidable Blindness. *Community*  
338 *Eye Health*. 2006;19(60):68-69. PMID: 17515970

339 6. Malaysia, J. P. Laporan Survei Pendapatan Isi Rumah dan Kemudahan Asas  
340 2019. Putrajaya: Jabatan Perangkaan Malaysia.

- 341 7. Mactaggart I, Limburg H, Bastawrous A, Burton, MJ, Kuper H. Rapid Assessment of  
342 Avoidable Blindness: looking back, looking forward. *Br J Ophthalmol*.  
343 2019;103(11):1549-1552. DOI: 10.1136/bjophthalmol-2019-314015 PMID: 31266777
- 344 8. Rapid Assessment of Avoidable Blindness: About RAAB7. Available from:  
345 <https://www.raab.world/about-raab/raab7>
- 346 9. World Health Organization. Prevention of Blindness & Deafness. Consultation on  
347 Development of Standards for Characterization of Visual Loss and Visual Function  
348 [Internet]. Geneva: World Health Organization; 4–5 september 2003.  
349 WHO/PBL/03.91) Available from: [http://whqlibdoc.who.int/hq/2003/WHO\\_PBL\\_03.](http://whqlibdoc.who.int/hq/2003/WHO_PBL_03.91.pdf)  
350 91. pdf.
- 351 10. Department of Statistics, Malaysia. Population Quick Info: Available at:  
352 <https://pqi.stats.gov.my/searchBI.php>
- 353 11. Current Population Estimates, Malaysia, 2023, Department of Statistics Malaysia. ISSN  
354 2426-2273
- 355 12. Randrianaivo JB, Anholt RM, Tendrisoa DL, Margiano NJ, Courtright P, Lewallen S.  
356 Blindness and Cataract Surgical Services in Atsinanana Region, Madagascar. *Middle*  
357 *East Afr J Ophthalmology*. 2014;21(2):153-157. DOI: 10.4103/0974-9233.129767.  
358 PMID: 24791107
- 359 13. Kalua K, Lindfield R, Mtupanyama M, Mtumodzi D, Msiska V. Findings from a Rapid  
360 Assessment of Avoidable Blindness (RAAB) in Southern Malawi. *PLoS One*.  
361 2011;6(4): e19226. DOI:10.1371/journal.pone.0019226 PMID: 21547074

- 362 14. Rius A, Guisasola L, Sabidó M, Leasher JL, Moraña D, Villalobos A, et al. Prevalence  
363 of Visual Impairment in El Salvador: Inequalities in Educational Level and  
364 Occupational Status. *Rev Panam Salud Publica*. 2014;36(5):290-299. PMID: 25604098
- 365 15. Singh N, Eeda SS, Gudapati BK, Reddy S, Kanade P, Palamaner G, et al. Prevalence  
366 and Causes of Blindness and Visual Impairment and Their Associated Risk Factors, in  
367 Three Tribal Areas of Andhra Pradesh, India. *PLoS One*. 2014;9(7):e100644.  
368 DOI:10.1371/journal.pone.0100644 PMID: 25007075
- 369 16. Gallarreta M, Furtado JM, Lansingh VC, Silva JC, Limburg H. Rapid Assessment of  
370 Avoidable Blindness in Uruguay: Results of a Nationwide Survey. *Rev Panam Salud*  
371 *Pública*. 2014;36(4):219-224. PMID: 25563146
- 372 17. Das T. Blindness and Visual Impairment Profile and Rapid Assessment of Avoidable  
373 Blindness in South East Asia: Analysis of New Data. 2017 APAO Holmes  
374 Lecture. *Asia-Pac J Ophthalmol*. 2018;7(5):312-315. DOI: 10.22608/APO.2017425  
375 PMID: 29532647
- 376 18. Rif'Ati L, Halim A, Lestari YD, Moeloek NF, Limburg H. Blindness and Visual  
377 Impairment Situation in Indonesia Based on Rapid Assessment of Avoidable Blindness  
378 Surveys in 15 Provinces. *Ophthalmic Epidemiol*. 2021;28(5):408. DOI:  
379 10.1080/09286586.2020.1853178 PMID: 33380229
- 380 19. Mörchen M, Langdon T, Ormsby GM, Meng N, Seiha D, Piseth K, Keeffe JE.  
381 Prevalence of Blindness and Cataract Surgical Outcomes in Takeo Province,  
382 Cambodia. *Asia-Pac J Ophthalmol*. 2015;4(1):25-31. DOI:  
383 10.1097/APO.0000000000000061. PMID: 26068610

- 384 20. Institute for Public Health 2020. National Health and Morbidity Survey (NHMS) 2019:  
385 Non-Communicable Diseases, Healthcare Demand, and Health Literacy—Key  
386 Findings. ISBN 978-983-99320-6-5MOH/S/IKU/173.20(BK)
- 387 21. Sangameswaran RP, Verma, GK, Raghavan N, Joseph J, Sivaprakasam M. Cataract  
388 Surgery in Mobile Eye Surgical Unit: Safe and Viable Alternative. *Indian J*  
389 *Ophthalmol.* 2016;64(11):835-839. DOI: 10.4103/0301-4738.195599 PMID: 27958207
- 390 22. Keshari R, Ghosh S, Agarwal A, Singh R, Vatsa M (2016). Mobile Periocular  
391 Matching with Pre-post Cataract Surgery. In *2016 IEEE International Conference on*  
392 *Image Processing (ICIP)* (pp. 3116-3120). IEEE.
- 393 23. Thavikulwat AT, Fisher SG, Thevenet-Morrison K, Pongtawigorn P, Ramchandran RS.  
394 Evaluation of Cataract Surgery Outcomes at the Ban Phaeo Mobile Eye Clinic,  
395 Thailand. *Ophthalmic Epidemiol.* 2015;22(4):266-273. DOI:  
396 10.3109/09286586.2015.1009120 PMID: 26218109
- 397 24. Salowi MA, Chong YF, Goh PP, Ismail M, Lim TO. CUSUM: A Dynamic Tool for  
398 Monitoring Competency in Cataract Surgery Performance. *Br J Ophthalmol.*  
399 2010;94(4):445-449 DOI:10.1136/bjo.2009.163063 PMID: 19951939
- 400 25. Pin GP, Salowi MA, Adnan TH, Sa'at N. The 12th Report of the National Eye Database  
401 2018. *National Eye Database (NED)*.
- 402 26. Lee MY, Goh PP, Salowi MA, Adnan TH, Ismail M. The Malaysian Cataract Surgery  
403 Registry: Cataract Surgery Practice Pattern. *Asia Pac J Ophthalmol.* 2014; 3(6):343-  
404 347. DOI:10.1097/APO.0000000000000030 PMID: 26107976

- 405 27. Salowi MA, Goh PP, Lee MY, Adnan TH, Ismail M. The Malaysian Cataract Surgery  
406 Registry: Profile of Patients Presenting for Cataract Surgery. *Asia-Pac J Ophthalmol.*  
407 2015;4(4):191-196. DOI: 10.1097/APO.000000000000068 PMID: 26172075  
408
- 409 28. Salowi MA, Chew FLM, Adnan TH, King C, Ismail M, Goh PP. The Malaysian  
410 Cataract Surgery Registry: Risk Indicators for Posterior Capsular Rupture. *Br J*  
411 *Ophthalmol.* 2017;101(11):1466-1470. DOI: 10.1136/bjophthalmol-2016-309902  
412 PMID: 28292773
- 413 29. Yong GY, Mohamed-Noor J, Salowi MA, Adnan TH, Zahari M. Risk Factors Affecting  
414 Cataract Surgery Outcome: The Malaysian Cataract Surgery Registry. *Plos One.*  
415 2022;17(9):e0274939. DOI: 10.1371/journal.pone.0274939 PMID: 36129906
- 416 30. Wai YZ, Chew LMF, Mohamad AS, Ang CL, Chong YY, Adnan TH, et al. The  
417 Malaysian Cataract Surgery Registry: Incidence and Risk Factors of Postoperative  
418 Infectious Endophthalmitis Over a 7-Year Period. *Int J Ophthalmology.*  
419 2018;11(10):1685-1690. DOI: 10.18240/ijo.2018.10.17 PMID: 30364221
- 420 31. Raju DG, Ramli N, Salowi MA. Incidence and Predictive Risk Factors for Post-  
421 Cataract Surgery Endophthalmitis in Ministry of Health Hospitals from 2012 to  
422 2020. *Ophthalmic Epidemiol.* 2023;1-7. DOI: 10.1080/09286586.2023.2273504  
423 PMID: 37899640
- 424 32. Bringing High-Impact, Good-Quality and Low-Cost Eye Care Closer to Home: A Case  
425 study of Klinik Katarak-Kementerian Kesihatan Malaysia. Manila: World Health  
426 Organization Regional Office for the Western Pacific; 2023. Licence: CC BY-NC-SA  
427 3.0 IGO.

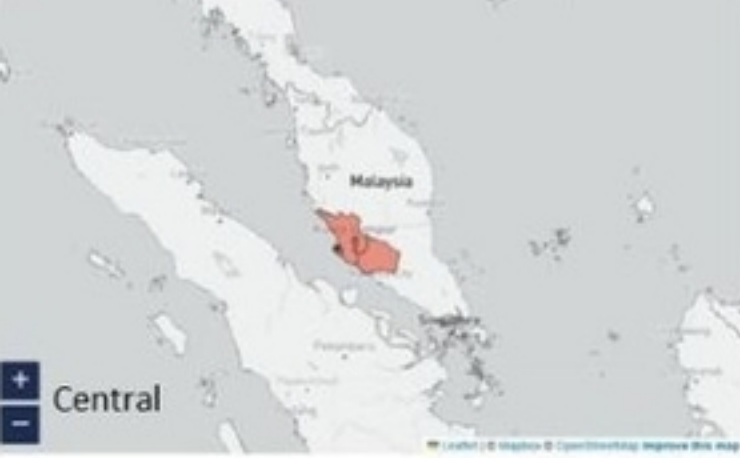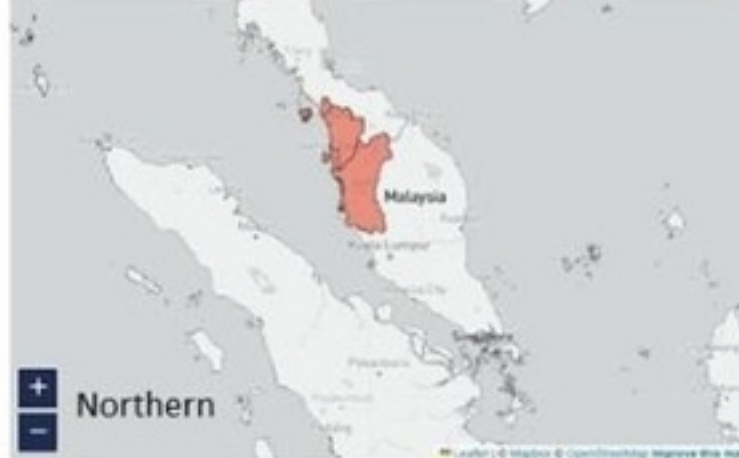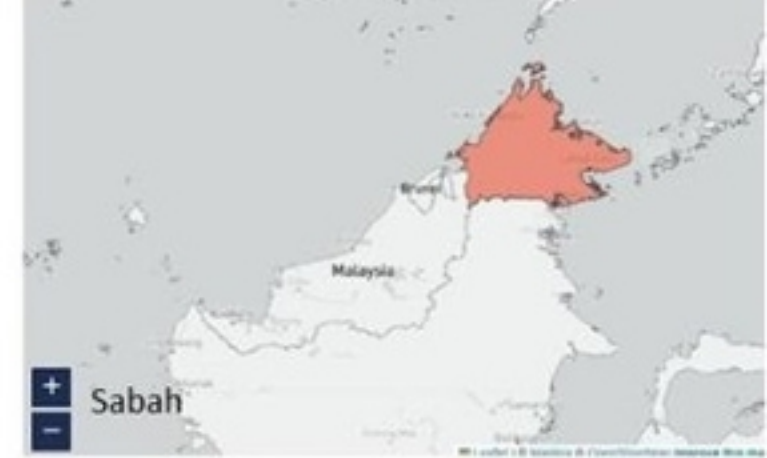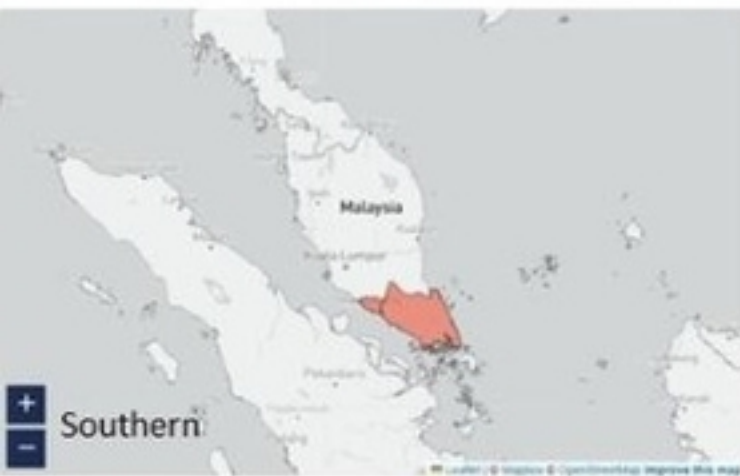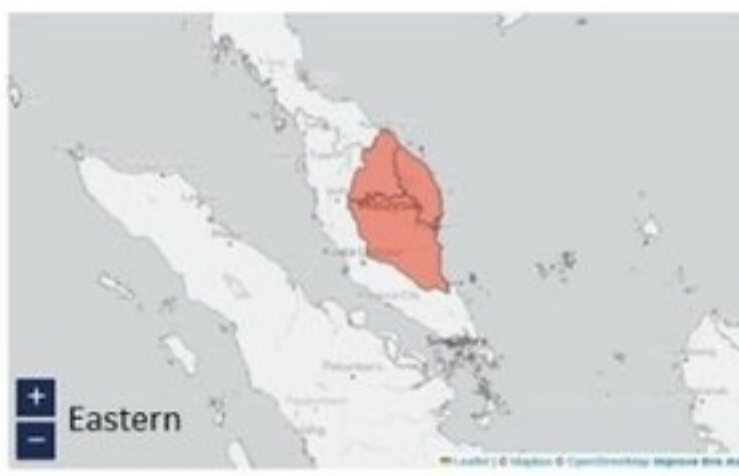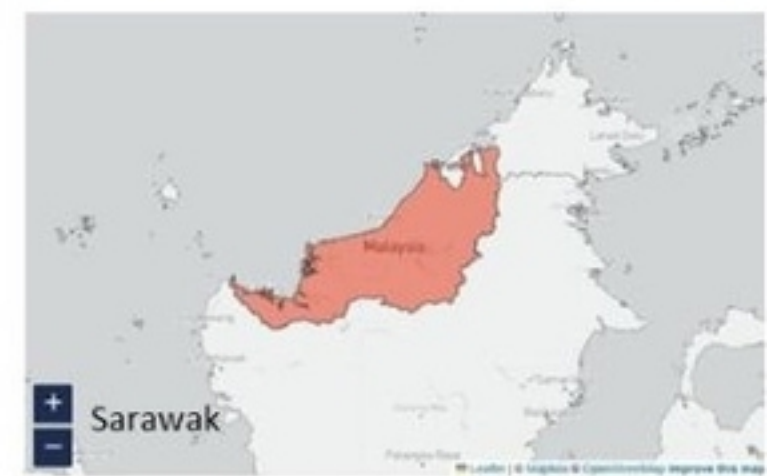

Source and Copyright: OpenStreetMap: <https://www.openstreetmap.org>. and RAAB world: <https://www.raab.world/>

| Region   | Total Population (million) | Population 50 years and older (%) |
|----------|----------------------------|-----------------------------------|
| Eastern  | 4.6                        | 13.0                              |
| Sarawak  | 2.5                        | 8.6                               |
| Central  | 10.3                       | 31.2                              |
| Northern | 6.7                        | 23.6                              |
| Southern | 5.0                        | 15.4                              |
| Sabah    | 3.5                        | 8.1                               |

Source and Copyright: Department of Statistic Malaysia 2020

Figure



Eastern: Female

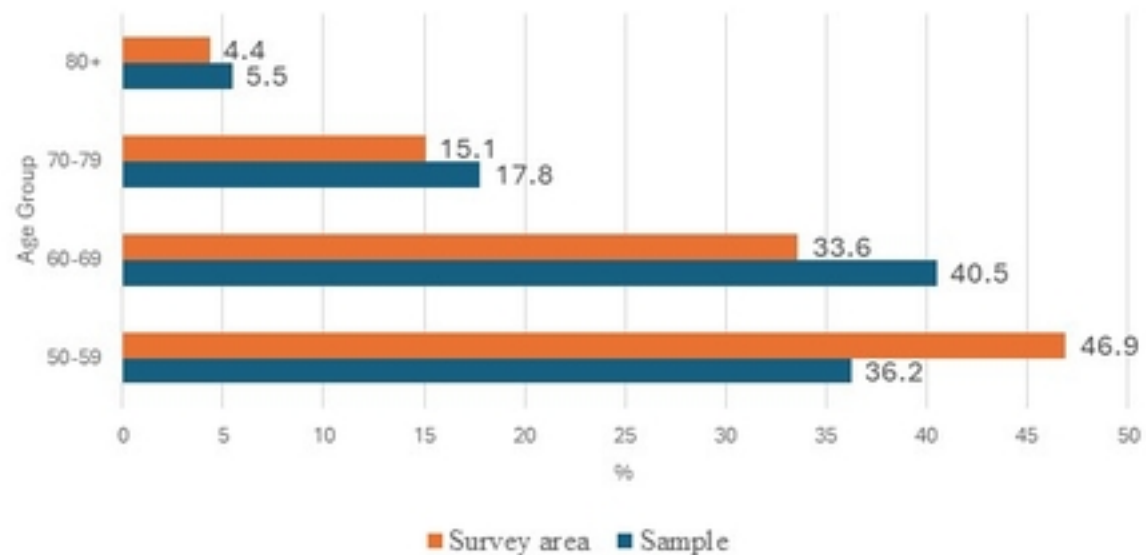

Eastern: Male

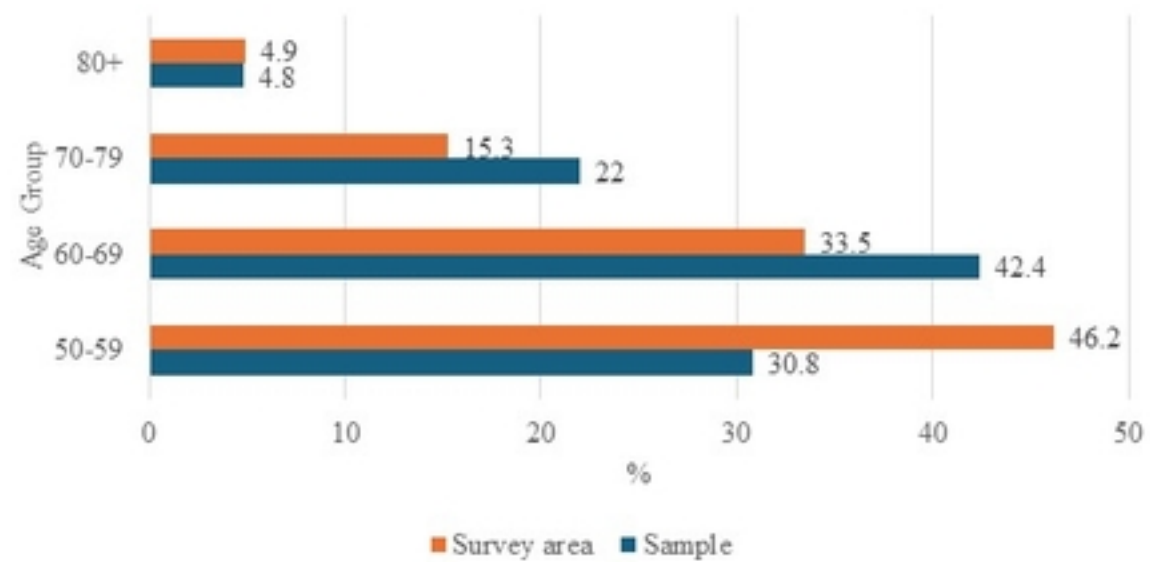

Sarawak: Female

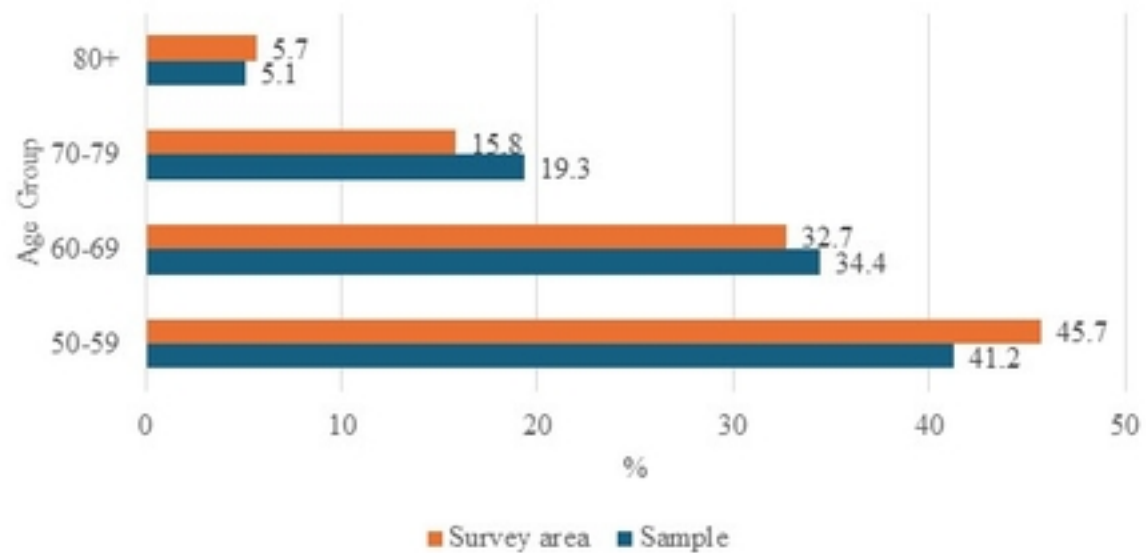

Sarawak: Male

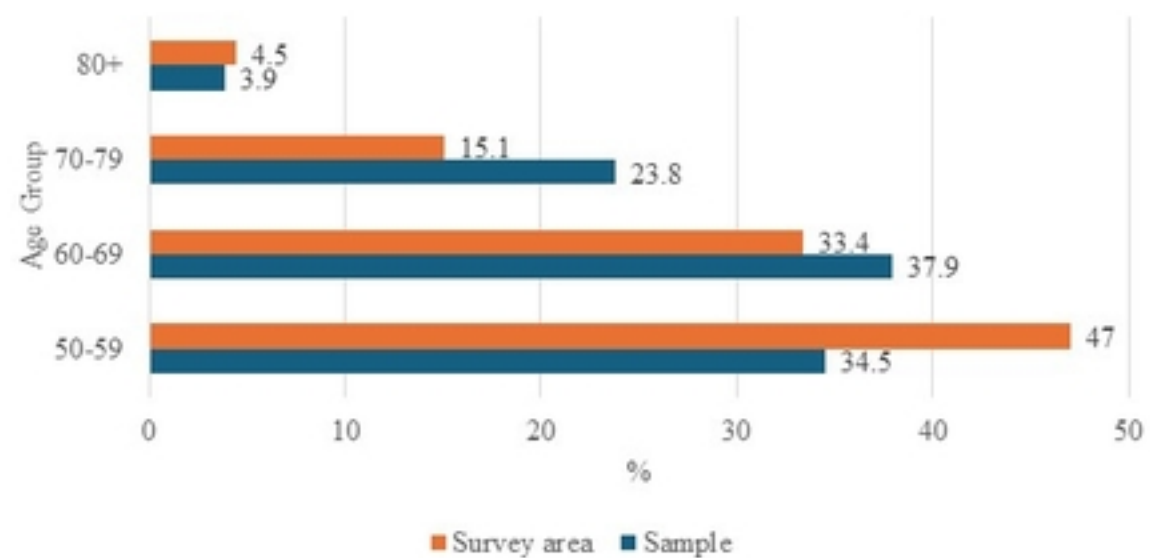

Figure

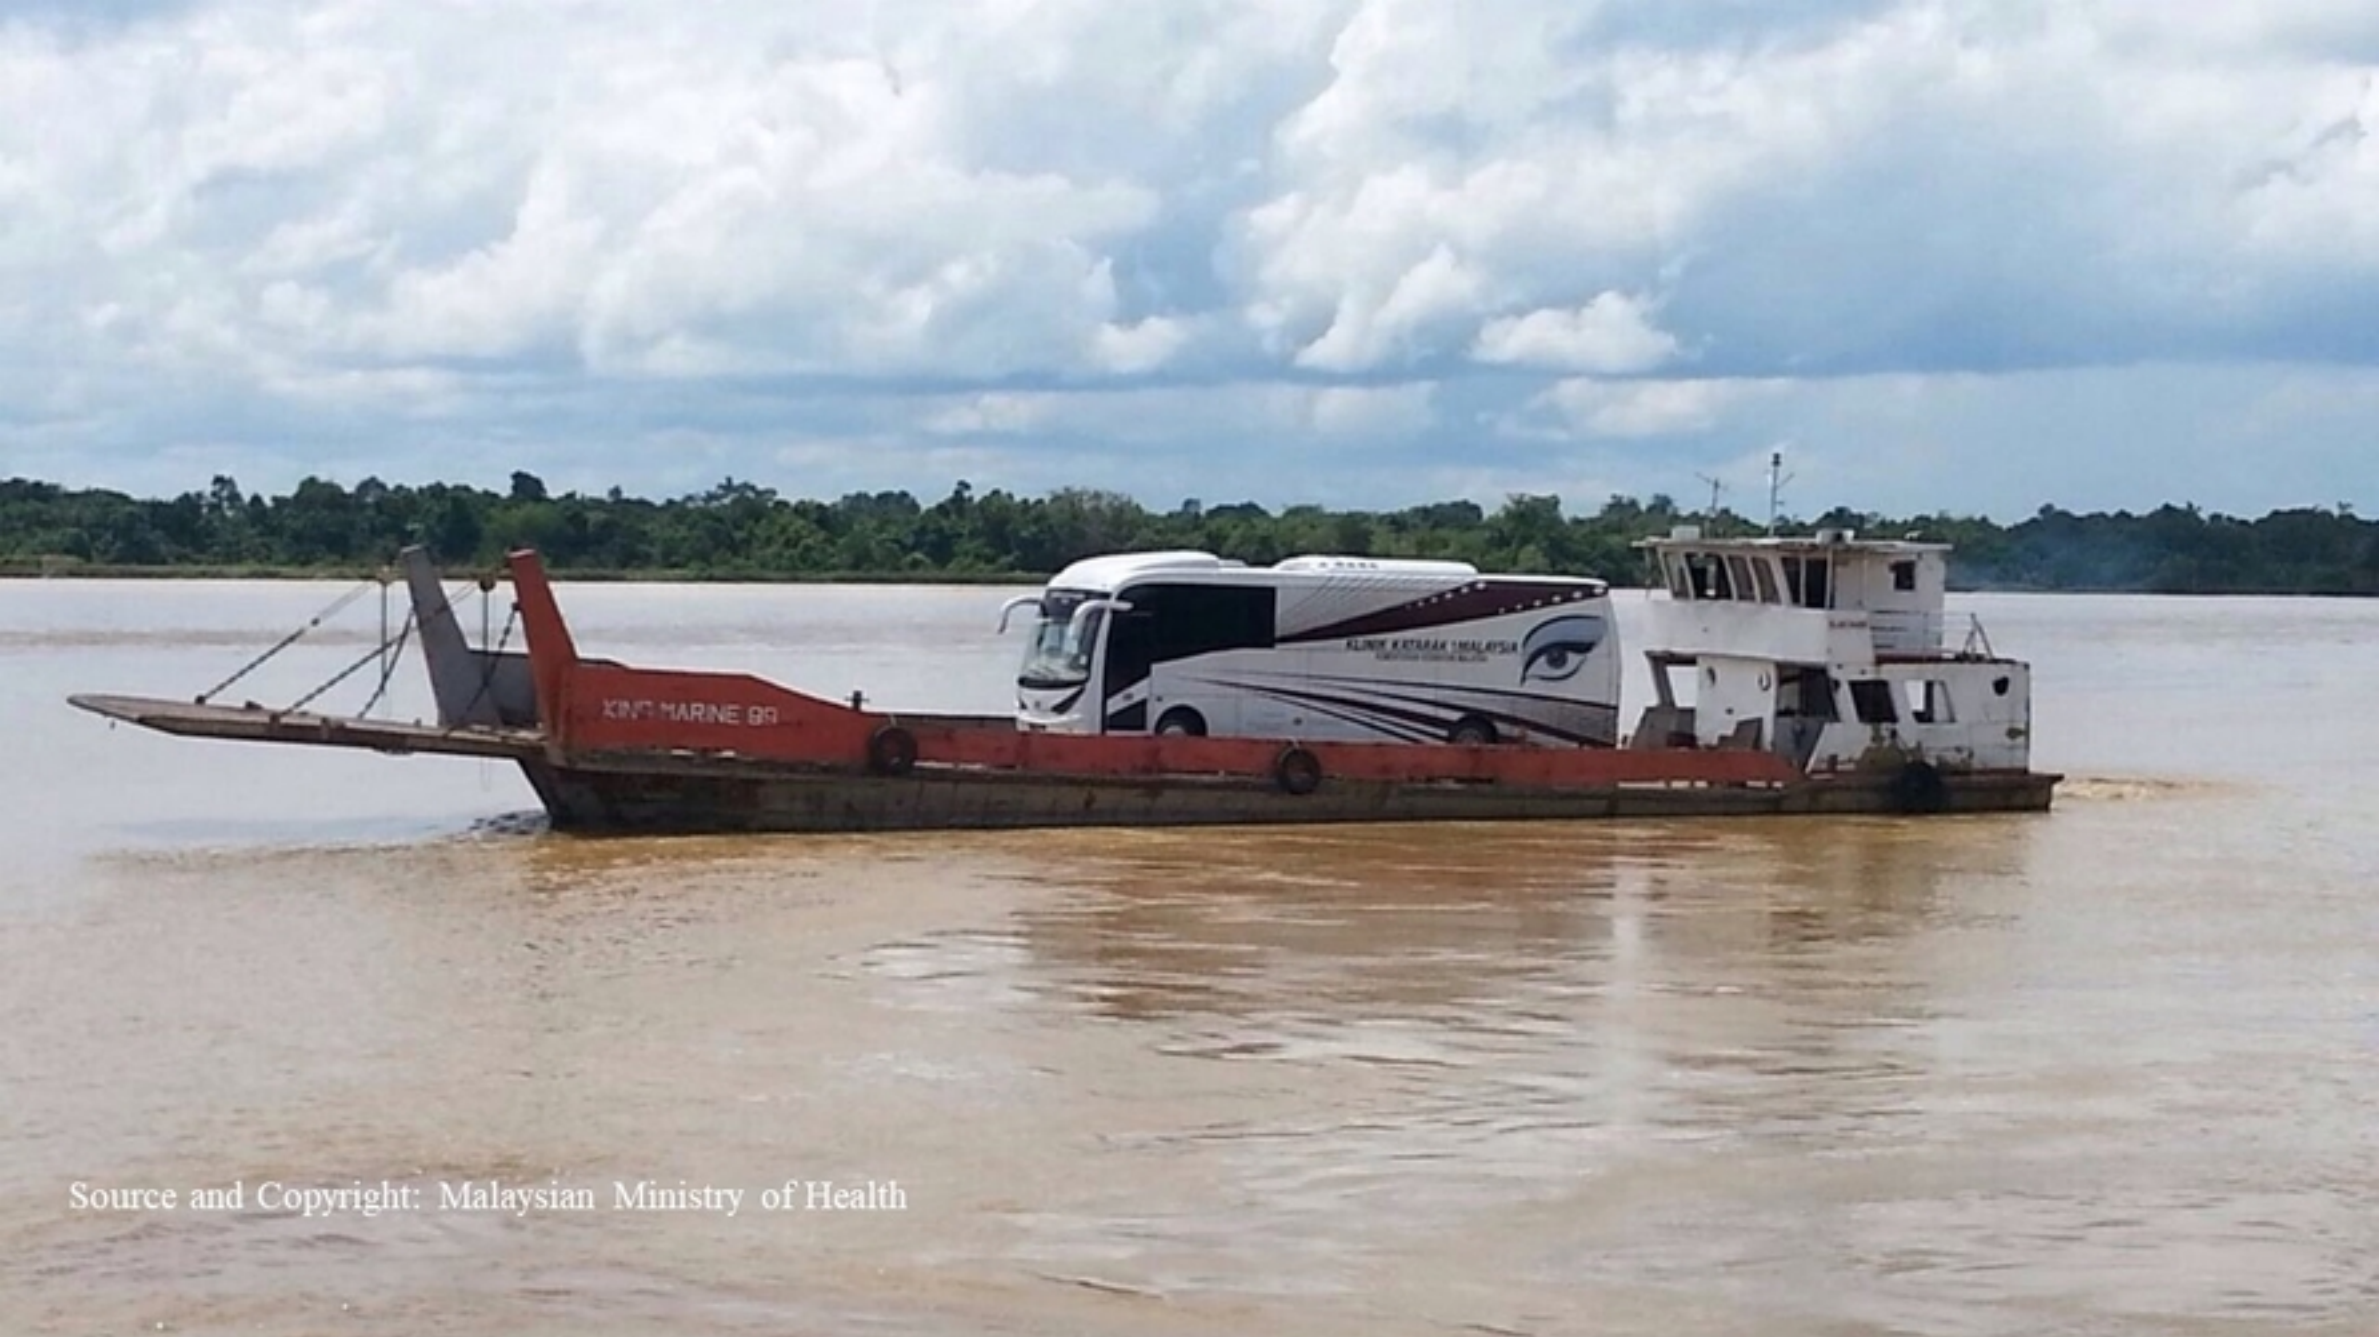

Source and Copyright: Malaysian Ministry of Health

Figure
